# Supplementary material for: Polymersomes as radionuclide carriers loaded via active ion transport through the hydrophobic bilayer
Source: Royal Society of Chemistry journal article supplement (doi:10.1039/c2sm26434j), 2012-11-08
Supplement: c2sm26434j.pdf [file c2sm26434j.pdf]

## Supporting information

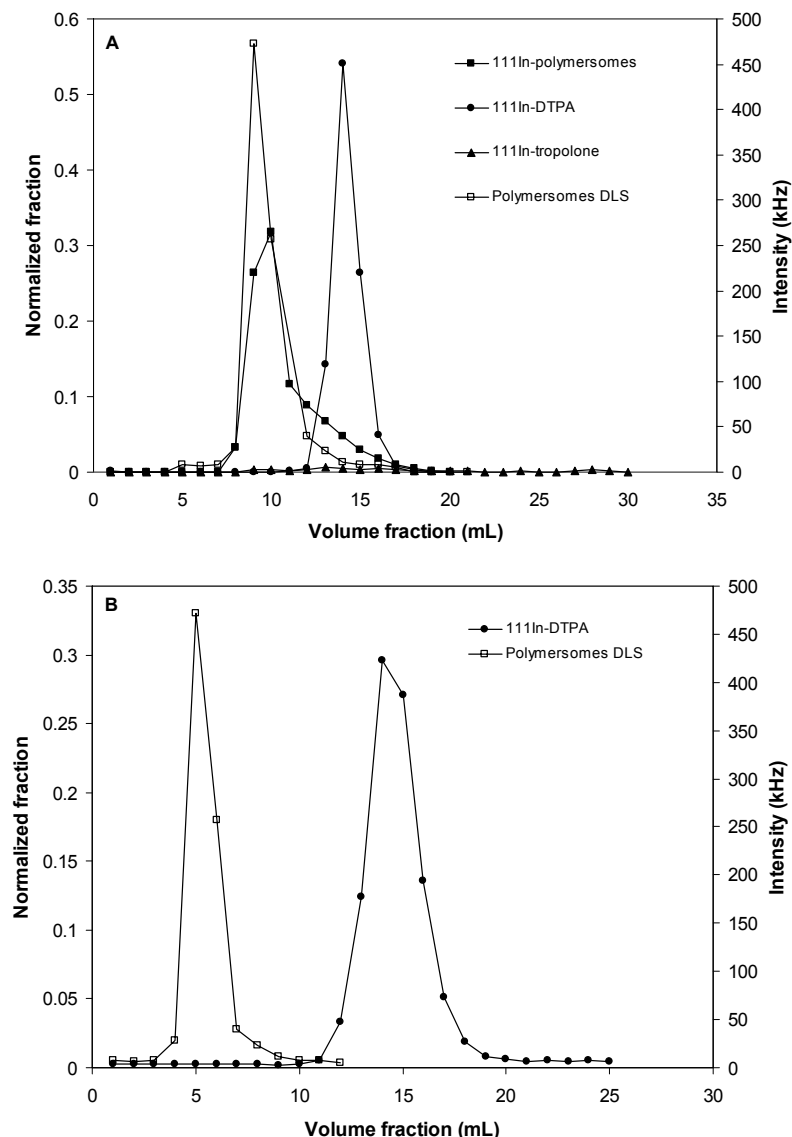

**Fig. 1A)** Elution profiles of different species corresponding to separation using Sephadex G-25 size exclusion column with dimensions of  $D \times L = 1 \times 30$  cm. The empty BE1 polymersomes ( $\square$ ) elution profile has been determined by DLS and given in kHz and BE1 polymersomes containing  $^{111}\text{In}$  ( $\blacksquare$ ), pure  $^{111}\text{In-DTPA}$  ( $\bullet$ ) and pure  $^{111}\text{In-tropolone}$  ( $\blacktriangle$ ) have been measured with a High Purity Germanium detector. The normalized fraction corresponds to the ratio of radioactivity in each volume fraction and the total radioactivity before separation. N.B. 95 % of all  $^{111}\text{In-tropolone}$  does not come off the column. **B)** Elution profiles of  $^{111}\text{In-DTPA}$  and empty polymersomes corresponding to separation using Sephadex G-25 size exclusion

column with dimensions of  $D \times L = 1 \times 21$  cm. The empty BE1 polymersomes ( $\square$ ) elution profile has been determined by DLS and is given in kHz and pure  $^{111}\text{In-DTPA}$  ( $\bullet$ ) has been measured with a High Purity Germanium detector. The normalized fraction corresponds to the ratio of radioactivity in each volume fraction and the total radioactivity before separation.

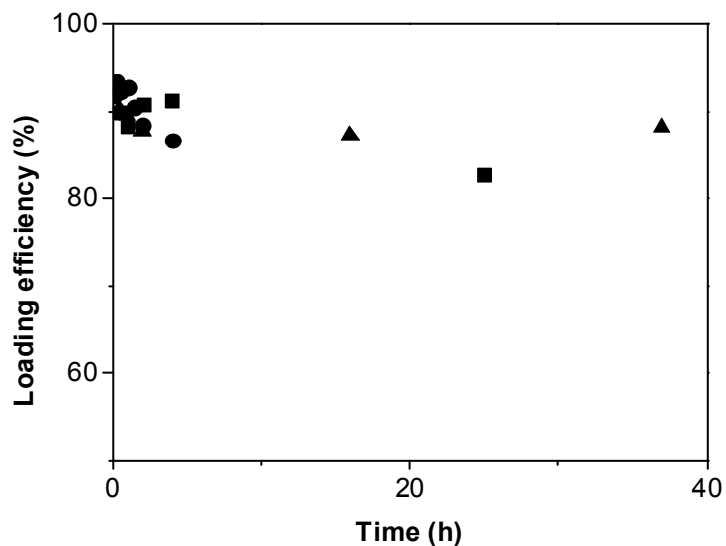

**Fig. 2** Effect of the loading time on the loading efficiency of BE1 polymersomes (triangles), BE3 polymersomes (circles) and BE4 polymersomes (squares). The concentration of polymersomes is 0.5 mg/ml, the  $^{111}\text{In}^{3+}$  activity is 0.15 MBq and the tropolone and DTPA concentration are respectively 20  $\mu\text{M}$  and 1 mM.

### Calculations encapsulated DTPA amount:

**For BE1 polymersomes,  $D=100$  nm**

a) Determining the average internal volume per vesicle

The average internal volume per vesicles,  $V_{\text{int}}$ , is calculated using the diameter of the polymersomes and the thickness of membrane. The membrane thickness  $W=7$  nm has

been determined by Cryo-EM. The diameter of polymersomes has been set at 100 nm according to the size measured by Cryo-EM.

$$V_{\text{int}} = \frac{4}{3}\pi[(D_i/2) - W]^3 = \frac{4}{3}\pi[(100/2) - 7]^3 = 3.3 \times 10^5 \text{ nm}^3$$

b) Determining the number of vesicles per gram of polymer

For the block copolymer poly(butadiene-*b*-ethylene oxide) (PB-PEO) used in this study, the PB content by weight is 66.7%. The weight of PB per gram of polymer is, therefore, equal to ca. 0.667 g/g. The volume of PB per vesicle is calculated using the equation below:

$$V_i^{PB} = \frac{4}{3}\pi[(D_i/2)^3 - (D_i/2 - W)^3] = \frac{4}{3}\pi[(100/2)^3 - ((100/2) - 7)^3] = 1.9 \times 10^5 \text{ nm}^3$$

PB weight of one polymersomes is:

$$W_{PB} = V^{PB} \times \rho = 1.9 \times 10^5 \text{ nm}^3 \times 0.93 \text{ g/mL} = 1.77 \times 10^{-16} \text{ g}$$

Assuming that the density of PB equals 0.93 g/mL, the concentration of polymersomes is 0.5 mg/mL. The number of vesicles per milliliter of solution can be expressed as:

$$N = \frac{\text{Weight of PB}}{\text{Average weight of PB per polymersomes}} = \frac{0.667 \times 0.5 \text{ mg}}{1.77 \times 10^{-16} \text{ g}} = 1.88 \times 10^{12}$$

c) 1 ml DTPA is equal to  $10^{-6}$  mol when 1 mM is used

Number of DTPA:

$$N_{DTPA} = 10^{-6} \times 6.02 \times 10^{23} = 6.02 \times 10^{17} \text{ per } 1 \text{ mL} = 6.02 \times 10^{-4} \text{ per } \text{nm}^3$$

One DTPA occupies volume of:

$$V_{DTPA} = \frac{1}{N} = 1661 \text{ nm}^3$$

Total Number of DTPA is:

$$N_{\text{total DTPA}} = N_{\text{polymersomes}} \times V_{\text{internal}} \times V_{DTPA} = 1.88 \times 10^{12} \times 3.3 \times 10^5 \times 6.02 \times 10^{-4} = 3.73 \times 10^{14}$$

d) 37 MBq Indium is equal to  $2.15 \times 10^{-11}$  mol.

The maximum loading capacity is then:

$$A = \frac{N_{DTPA}}{N_{37\text{MBq}}} \times 37 \text{ MBq} = \frac{3.73 \times 10^{14}}{1.2 \times 10^{13}} \times 37 \text{ MBq} = 1151 \text{ MBq}$$

**For BE2 polymersomes, 100 nm,**

a) Determining the average internal volume per vesicle

The average internal volume per vesicles,  $V_{\text{int}}$ , is calculated using the diameter of the polymersomes and the thickness of membrane. The membrane thickness has been set at  $W=13$  nm measured by Cryo-EM. The diameter of polymersomes ( $D$ ) has been set at 100 nm according to the Cryo-EM measurements.

$$V_{\text{int}} = \frac{4}{3} \pi \left[ \left( \frac{D_i}{2} \right) - W \right]^3 = \frac{4}{3} \pi \left[ \left( \frac{100}{2} \right) - 13 \right]^3 = 2.1 \times 10^5 \text{ nm}^3$$

b) Determining the number of vesicles per gram of polymer

For the block copolymer poly(butadiene-b-ethylene oxide) (PB-PEO), the PB content by weight is 62.5%. The weight of PB per gram of polymer is, therefore, equal to ca. 0.625 g/g. The volume of PB per vesicle is calculated using equation below:

$$V_i^{PB} = \frac{4}{3}\pi[(D_i/2)^3 - (D_i/2 - W)^3] = \frac{4}{3}\pi[(100/2)^3 - ((100/2) - 13)^3] = 3.11 \times 10^5 \text{ nm}^3$$

PB weight of one polymersomes is:

$$W_{PB} = V^{PB} \times \rho = 3.11 \times 10^5 \times 0.93 \text{ g/mL} = 2.89 \times 10^{-16} \text{ g}$$

Assuming that the density of PB is equal 0.93 g/ml and the concentration of polymersomes is 0.5 mg/ml. The number of vesicles per milliliter of solution can be expressed as:

$$N = \frac{\text{Weight of PB}}{\text{Average weight of PB per polymersomes}} = \frac{0.625 \times 0.5 \text{ mg}}{2.89 \times 10^{-16} \text{ g}} = 1.1 \times 10^{12}$$

c) 1 ml DTPA is equal to  $10^{-6}$  mol when 1 mM is used.

Number of DTPA:

$$N_{DTPA} = 10^{-6} \times 6.02 \times 10^{23} = 6.02 \times 10^{17} \text{ per 1 mL} = 6.02 \times 10^{-4} \text{ per nm}^3$$

One DTPA occupy volume is:

$$V_{DTPA} = \frac{1}{N} = 1661 \text{ nm}^3$$

Total Number of DTPA is:

$$N_{total\ DTPA} = N_{polymersomes} \times V_{internal} \times V_{DTPA} = 1.0 \times 10^{12} \times 2.1 \times 10^5 \times 6.02 \times 10^{-4} = 1.26 \times 10^{14}$$

d) 37 MBq Indium is equal to  $2.15 \times 10^{-11}$  mol.

The maximum loading capacity is then:

$$A = \frac{N_{DTPA}}{N_{37MBq}} \times 37\ MBq = \frac{1.17 \times 10^{14}}{1.29 \times 10^{13}} \times 37\ MBq = 335\ MBq$$
